# Supplementary material for: Training modalities in robot-mediated upper limb rehabilitation in stroke: a framework for classification based on a systematic review
Source: Springer Nature journal article supplement (doi:10.1186/1743-0003-11-111), 2014-01-01
Supplement: 12984_2013_634_MOESM1_ESM.pdf [file 12984_2013_634_MOESM1_ESM.pdf]

# **Additional file 1. Search strategy**

## ***Disorder***

1. "cerebrovascular disorders"[MeSH Terms]
2. CVA
3. stroke
4. "stroke"[MeSH Terms]
5. "hemiplegia"[MeSH Terms]
6. hemipleg\*
7. hemipare\*
8. cerebrovasc\* OR cerebral vascular
9. #1 OR #2 OR #3 OR #4 OR #5 OR #6 OR #7 OR #8

## ***Intervention***

10. "robotics"[MeSH Terms]
11. robot\*
12. #10 OR #11

## ***Body segment***

13. "upper extremity"[MeSH Terms]
14. "arm"[MeSH Terms]
15. upper extremity
16. upper extremities
17. arm
18. arms
19. upper limb
20. upper limbs
21. shoulder
22. elbow
23. wrist
24. hand
25. #13 OR #14 OR #15 OR #16 OR #17 OR #18 OR #19 OR #20 OR #21 OR #22 OR #23 OR #24

## ***Combination cerebrovascular disorders, robotics & upper extremity***

26. #9 AND #12 AND #25

## ***Limitations***

27. training
28. therapy
29. #27 OR #28

- 30. motor
- 31. function
- 32. #30 OR #31

***Total search strategy***

- 33. #26 AND #29 AND #32
